# Supplementary material for: PU-91 drug rescues human age-related macular degeneration RPE cells; implications for AMD therapeutics
Source: publisher site journal article supplement (doi:10.18632/aging.102179), 2019-09-02
Supplement: Supplementary file [file aging-v11i17-102179-supplementary-material-SD1.pdf]

## SUPPLEMENTARY TABLES

Supplementary Table 1. AMD Patient/ Cybrid cell lines' Patient Information.

| CYBRID NUMBER | CYBRID TYPE | AGE | GENDER | RACE  | HAPLOGROUP |
|---------------|-------------|-----|--------|-------|------------|
| 1             | AMD         | 81  | Female | White | H          |
| 2             | AMD         | 82  | Female | White | H          |
| 3             | AMD         | 86  | Female | White | H          |
| 4             | AMD         | 84  | Female | White | H          |
| 5             | AMD         | 75  | Female | White | H          |
| 6             | AMD         | 76  | Male   | White | H          |
| 7             | AMD         | 83  | Male   | White | H          |
| 8             | AMD         | 74  | Male   | White | H          |
| 9             | AMD         | 76  | Male   | White | H          |
| 10            | AMD         | 83  | Male   | White | H          |

This table provides information about the AMD patients and AMD cybrid cell lines.

Supplementary Table 2. Effects of PU-91 + EI-12 on cell viability.

|                                                               |               |                                   |                                   |                                    |                                    |                                 |
|---------------------------------------------------------------|---------------|-----------------------------------|-----------------------------------|------------------------------------|------------------------------------|---------------------------------|
| <b>Effect of EI-12 on cell viability<br/>48 hr Time point</b> | <b>AMD UN</b> | <b>AMD<br/>Only PU-91-treated</b> | <b>AMD<br/>PU-91 + EI-12 5 µM</b> | <b>AMD<br/>PU-91 + EI-12 10 µM</b> | <b>AMD<br/>PU-91 + EI-12 20 µM</b> | <b>AMD<br/>Only EI-12 20 µM</b> |
| Mean ± SEM                                                    | 1 ± 0.07      | 1.33 ± 0.09                       | 1.215 ± 0.09027                   | 1.176 ± 0.07125                    | 1.253 ± 0.07453                    | 1.037 ± 0.1413                  |
| <b>Effect of EI-12 on cell viability<br/>72 hr Time point</b> | <b>AMD UN</b> | <b>AMD<br/>Only PU-91-treated</b> | <b>AMD<br/>PU-91 + EI-12 5 µM</b> | <b>AMD<br/>PU-91 + EI-12 10 µM</b> | <b>AMD<br/>PU-91 + EI-12 20 µM</b> | <b>AMD<br/>Only EI-12 20 µM</b> |
| Mean ± SEM                                                    | 1 ± 0.09      | 1.37 ± 0.07                       | 1.335 ± 0.08792                   | 1.361 ± 0.07264                    | 1.452 ± 0.06857                    | 1.259 ± 0.1060                  |

This table shows the additive effects of PU-91 + EI-12 on cell viability. All values are normalized to 1 and are presented as Mean ± SEM.

**Supplementary Table 3. Effects of PU-91 + EI-78 on cell viability.**

| Effect of EI-78 on cell viability<br>48 hr Time point | AMD UN   | AMD<br>Only PU-91-treated | AMD<br>PU-91 + EI-78 2.5 µM | AMD<br>PU-91 + EI-78 5 µM | AMD<br>PU-91 + EI-78 10 µM | AMD<br>Only EI-78 10 µM |
|-------------------------------------------------------|----------|---------------------------|-----------------------------|---------------------------|----------------------------|-------------------------|
| Mean ± SEM                                            | 1 ± 0.07 | 1.33 ± 0.09               | 1.05 ± 0.09                 | 1.10 ± 0.06               | 0.91 ± 0.19                | 0.95 ± 0.11             |
| Effect of EI-78 on cell viability<br>72 hr Time point | AMD UN   | AMD<br>Only PU-91-treated | AMD<br>PU-91 + EI-78 2.5 µM | AMD<br>PU-91 + EI-78 5 µM | AMD<br>PU-91 + EI-78 10 µM | AMD<br>Only EI-78 10 µM |
| Mean ± SEM                                            | 1 ± 0.09 | 1.37 ± 0.07               | 1.19 ± 0.04                 | 1.17 ± 0.08               | 1.21 ± 0.09                | 0.99 ± 0.09             |

This table shows the additive effects of PU-91 + EI-78 on cell viability. All values are normalized to 1 and are presented as Mean ± SEM.

**Supplementary Table 4. Effects of PU-91 + EI-12 on gene expression.**

| Effect of EI-12 on gene expression |            | AMD UN     | AMD<br>Only PU-91-treated | AMD<br>PU-91 + EI-12 5 µM | AMD<br>PU-91 + EI-12 10 µM | AMD<br>PU-91 + EI-12 20 µM | AMD<br>Only EI-12 20 µM |
|------------------------------------|------------|------------|---------------------------|---------------------------|----------------------------|----------------------------|-------------------------|
| <i>PGC-1α</i>                      | Mean ± SEM | 1 ± 0.02   | 3.48 ± 0.45               | 3.16 ± 0.71               | 3.63 ± 0.69                | 2.15 ± 0.24                | 1.82 ± 0.57             |
| <i>Caspase-3</i>                   | Mean ± SEM | 1 ± 0.0002 | 0.65 ± 0.04               | 0.78 ± 0.06               | 0.73 ± 0.06                | 0.66 ± 0.09                | 0.74 ± 0.045            |
| <i>IL-18</i>                       | Mean ± SEM | 1 ± 0.004  | 0.49 ± 0.09               | 0.82 ± 0.09               | 0.88 ± 0.12                | 0.77 ± 0.11                | 0.78 ± 0.13             |
| <i>VEGF</i>                        | Mean ± SEM | 1 ± 0.002  | 0.45 ± 0.17               | 0.40 ± 0.09               | 0.37 ± 0.08                | 0.37 ± 0.12                | 0.42 ± 0.16             |
| <i>SOD2</i>                        | Mean ± SEM | 1 ± 0.06   | 2.81 ± 0.11               | 2.05 ± 0.83               | 1.57 ± 0.53                | 1.51 ± 0.57                | 0.88 ± 0.22             |

This table shows the additive effects of PU-91 + EI-12 on gene expression. All values are normalized to 1 and are presented as Mean ± SEM.

**Supplementary Table 5. Effects of PU-91 + EI-78 on gene expression.**

| Effect of EI-78 on gene expression |                | AMD UN         | AMD Only PU-91-treated | AMD PU-91 + EI-78 2.5 $\mu$ M | AMD PU-91 + EI-78 5 $\mu$ M | AMD PU-91 + EI-78 10 $\mu$ M | AMD Only EI-78 10 $\mu$ M |
|------------------------------------|----------------|----------------|------------------------|-------------------------------|-----------------------------|------------------------------|---------------------------|
| <b>PGC-1<math>\alpha</math></b>    | Mean $\pm$ SEM | 1 $\pm$ 0.02   | 3.48 $\pm$ 0.45        | 2.89 $\pm$ 0.41               | 2.09 $\pm$ 0.37             | 2.26 $\pm$ 0.64              | 1.40 $\pm$ 0.48           |
| <b>Caspase-3</b>                   | Mean $\pm$ SEM | 1 $\pm$ 0.0002 | 0.65 $\pm$ 0.04        | 0.74 $\pm$ 0.019              | 0.85 $\pm$ 0.12             | 0.66 $\pm$ 0.05              | 0.86 $\pm$ 0.06           |
| <b>IL-18</b>                       | Mean $\pm$ SEM | 1 $\pm$ 0.004  | 0.49 $\pm$ 0.09        | 0.65 $\pm$ 0.13               | 0.55 $\pm$ 0.06             | 0.39 $\pm$ 0.08              | 0.71 $\pm$ 0.25           |
| <b>VEGF</b>                        | Mean $\pm$ SEM | 1 $\pm$ 0.002  | 0.45 $\pm$ 0.17        | 0.53 $\pm$ 0.21               | 0.47 $\pm$ 0.14             | 0.51 $\pm$ 0.18              | 0.52 $\pm$ 0.19           |
| <b>SOD2</b>                        | Mean $\pm$ SEM | 1 $\pm$ 0.06   | 2.81 $\pm$ 0.11        | 1.99 $\pm$ 0.59               | 1.62 $\pm$ 0.57             | 1.82 $\pm$ 0.69              | 1.71 $\pm$ 0.46           |

This table shows the additive effects of PU-91 + EI-78 on gene expression. All values are normalized to 1 and are presented as Mean  $\pm$  SEM.
